# Supplementary material for: The structure of microbial communities of activated sludge of large-scale wastewater treatment plants in the city of Moscow
Source: PubMed Central journal article supplement (PMC8891259; doi:10.1038/s41598-022-07132-4), 2022-03-02
Supplement: 41598_2022_7132_MOESM1_ESM.pdf [file 41598_2022_7132_MOESM1_ESM.pdf]

### Plug-flow bioreactors at WWTPs 4, 8 and 9

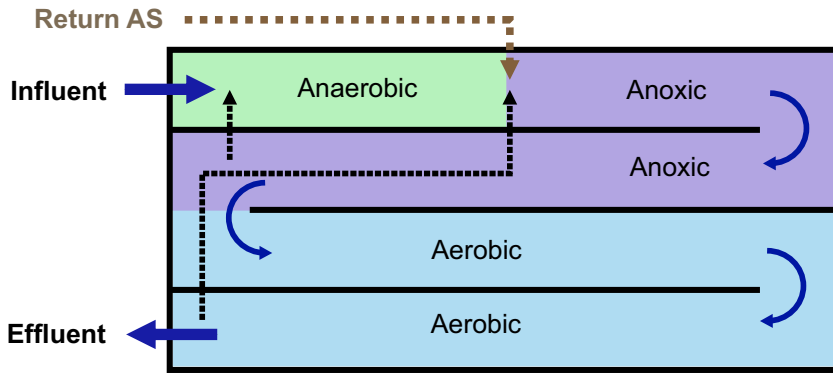

### Carrousel bioreactors at WWTPs 3, 5 and 6

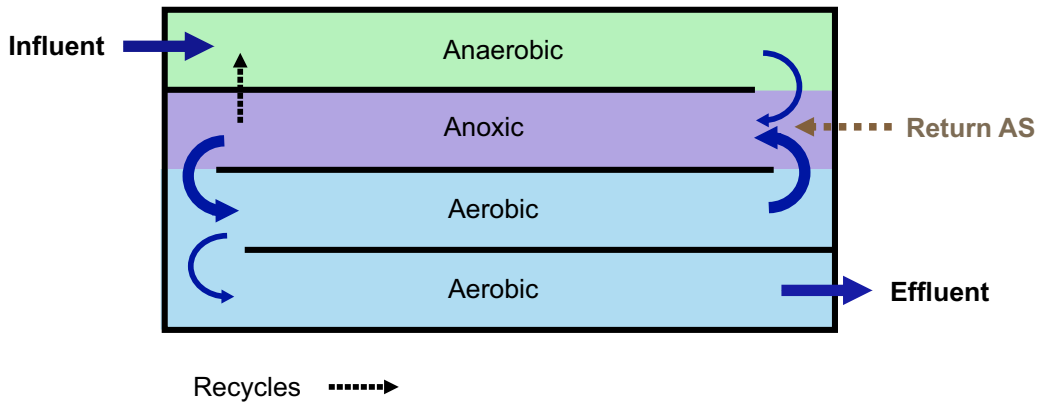

Supplementary Figure S1. Schemes of two types of bioreactors operated using the UCT technology.
