# Supplementary material for: The structure of microbial communities of activated sludge of large-scale wastewater treatment plants in the city of Moscow
Source: PubMed Central journal article supplement (PMC8891259; doi:10.1038/s41598-022-07132-4), 2022-03-02
Supplement: 41598_2022_7132_MOESM2_ESM.pdf [file 41598_2022_7132_MOESM2_ESM.pdf]

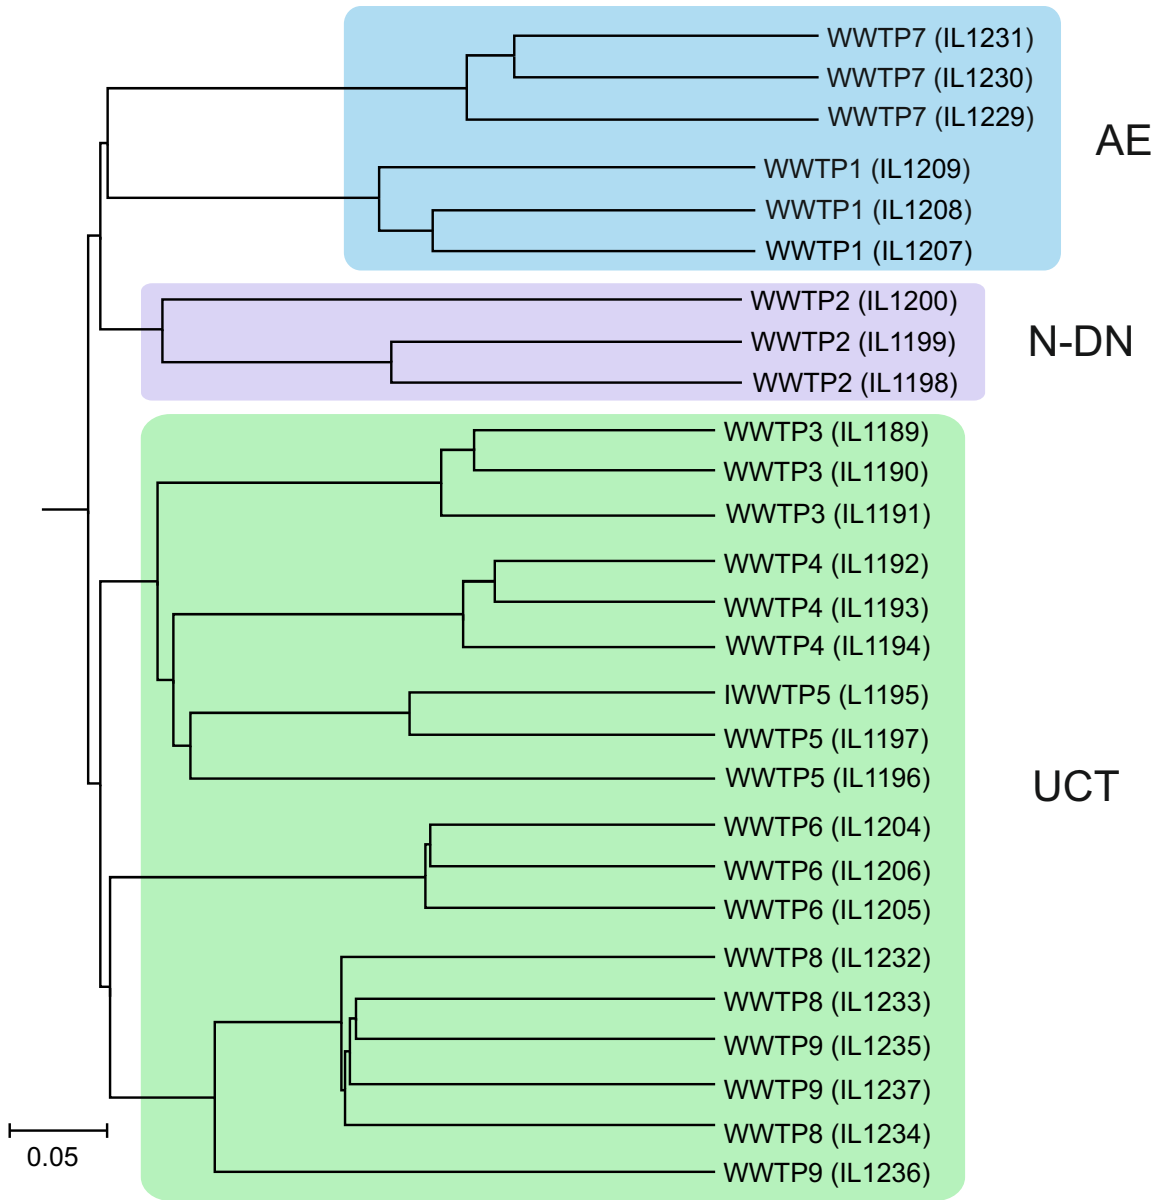

Supplementary Figure S2. Neighbor joining tree illustrating Jaccard distances between microbial communities of AS samples from 9 WWTPs (three replications). Sample IDs are shown in brackets after the WWTP number.
